# Supplementary material for: Identification of osmotic stress-responsive genes from Leymus mollis, a wild relative of wheat (Triticum aestivum L.)
Source: PubMed Central journal article supplement — Breed Sci. 2012 Mar 20;62(1):78–86. doi: 10.1270/jsbbs.62.78 (PMC3405956; doi:10.1270/jsbbs.62.78), 2012-03-20
Supplement: 62_78suppl.pdf [file 62_78suppl.pdf]

**Supplemental Table 1.** Differentially expressed genes in *L. mollis* drought SSH library.

| Clone ID                 | Accession | Homology                                       | Organism                    | Identity % | E-value | Accession    |
|--------------------------|-----------|------------------------------------------------|-----------------------------|------------|---------|--------------|
| Lm1_G03_47               | JK317151  | Dehydrin                                       | <i>Hordeum vulgare</i>      | 71         | 1e-114  | AAF01690     |
| Lm2_F06_87               | JK317162  | Harpin inducing protein                        | <i>Oryza sativa</i>         | 66         | 2e-13   | ABR25843     |
| Lm3_F04_62               | JK317173  | Ribulose-bisphosphate carboxylases             | <i>Arabidopsis thaliana</i> | 92         | 3e-39   | ATCG00490    |
| Lm4_F03_46               | JK317184  | Xylanase inhibitor                             | <i>Triticum aestivum</i>    | 100        | 5e-11   | BAF74364     |
| Lm5_E03_45               | JK317194  | Putative senescence-associated protein         | <i>Pisum sativum</i>        | 85         | 1e-14   | BAB33421     |
| Lm6_E01_10 <sup>a</sup>  | JK317205  | Aquaporin 2.1                                  | <i>Triticum turgidum</i>    | 85         | 8e-21   | EU182655     |
| Lm7_D04_59               | JK317216  | NADPH quinone oxidoreductase 1                 | <i>Zea mays</i>             | 73         | 1e-57   | ACG47380     |
| Lm8_D03_43               | JK317227  | Putative senescence-associated protein         | <i>Lilium longiflorum</i> ] | 98         | 4e-57   | ABO20851     |
| Lm9_D02_24               | JK317238  | Putative diacylglycerol kinase                 | <i>Oryza sativa</i>         | 77         | 3e-33   | AAS07206     |
| Lm11_C02_22              | JK317142  | Annexin                                        | <i>Zea mays</i>             | 96         | 3e-24   | NP_001105728 |
| Lm12_C01_6               | JK317143  | Transaldolase 2                                | <i>Oryza sativa</i>         | 89         | 6e-66   | ABR25370     |
| Lm13_H01_4               | JK317144  | UDP-glucosyl transferase                       | <i>Arabidopsis thaliana</i> | 41         | 0.002   | AT3G53160    |
| Lm14_G06_43 <sup>a</sup> | JK317145  | Thioredoxin h                                  | <i>Triticum aestivum</i>    | 96         | 9e-12   | EU706448     |
| Lm15_G02_11              | JK317146  | (1,3;1,4) beta-glucanase                       | <i>Triticum aestivum</i>    | 91         | 4e-13   | ABB96917     |
| Lm16_F01_2               | JK317147  | Putative fructose 1-,6-biphosphate aldolase    | <i>Triticum aestivum</i>    | 88         | 8e-72   | CAD12665     |
| Lm17_D03_16              | JK317148  | Putative diacylglycerol kinase                 | <i>Oryza sativa</i>         | 82         | 7e-27   | AAS07206     |
| Lm18_D02_8               | JK317149  | Xyloglucan endotransglucosylase/hydrolase      | <i>Arabidopsis thaliana</i> | 65         | 8e-04   | AT5G57550    |
| Lm19_H06_86              | JK317150  | Putative rubisco activase                      | <i>Vigna unguiculata</i>    | 84         | 1e-34   | CAO02538     |
| Lm20_H04_61              | JK317152  | Putative carbonic anhydrase                    | <i>Hordeum vulgare</i>      | 55         | 0.060   | P40880       |
| Lm21_H01_14              | JK317153  | Actin-depolymerizing factor 6                  | <i>Zea mays</i>             | 90         | 2e-62   | NP_001148357 |
| Lm22_G06_85              | JK317154  | Purple acid phosphatase 27                     | <i>Arabidopsis thaliana</i> | 68         | 2e-36   | AT5G50400    |
| Lm23_G03_42              | JK317155  | ABC2 transporter homolog 13                    | <i>Arabidopsis thaliana</i> | 75         | 7e-23   | AT5G64940    |
| Lm24_G01_13              | JK317156  | Chloroplast inositol phosphatase-like protein  | <i>Triticum aestivum</i>    | 99         | 2e-57   | AAU82110     |
| Lm25_F04_55              | JK317157  | Ribulose-1,5-bisphosphate carboxylase activase | <i>Triticum aestivum</i>    | 100        | 1e-22   | AAP72270     |
| Lm26_F02_25              | JK317158  | Ferredoxin-NADP(+)-oxidoreductase 1            | <i>Arabidopsis thaliana</i> | 88         | 2e-71   | AT5G66190    |
| Lm27_F01_11              | JK317159  | HPP integral membrane protein                  | <i>Zea mays</i>             | 90         | 9e-48   | NP_001150258 |
| Lm28_E06_83              | JK317160  | Lipoxygenase 3                                 | <i>Arabidopsis thaliana</i> | 48         | 8e-07   | AT1G17420    |
| Lm29_E05_71              | JK317161  | Lipoamide dehydrogenase                        | <i>Capsicum annuum</i>      | 95         | 1e-18   | AAS47493     |
| Lm30_D05_70 <sup>a</sup> | JK317163  | Predicted protein                              | <i>Hordeum vulgare</i>      | 71         | 2e-28   | AK355638     |
| Lm31_D04_53              | JK317164  | Putative carbonic anhydrase                    | <i>Hordeum vulgare</i>      | 95         | 4e-80   | P40880       |
| Lm32_D03_33              | JK317165  | Type II metacaspase                            | <i>Triticum aestivum</i>    | 95         | 4e-134  | ACY82389     |
| Lm33_D02_22              | JK317166  | Phosphoethanolamine methyltransferase          | <i>Triticum aestivum</i>    | 97         | 1e-53   | AAL40895     |

**Supplemental Table 1.** (continued)

| Clone ID                 | Accession | Homology                                           | Organism                         | Identity % | E-value | Accession    |
|--------------------------|-----------|----------------------------------------------------|----------------------------------|------------|---------|--------------|
| Lm34_D01_9               | JK317167  | Putative carbonic anhydrase                        | <i>Hordeum vulgare</i>           | 96         | 5e-82   | P40880       |
| Lm35_C06_78              | JK317168  | Nucleotide pyrophosphatase/phosphodiesterase       | <i>Hordeum vulgare</i>           | 90         | 1e-52   | CAE46394     |
| Lm36_C03_32              | JK317169  | Glycine decarboxylase P-protein 1                  | <i>Arabidopsis thaliana</i>      | 85         | 1e-70   | AT4G33010    |
| Lm37_C02_21              | JK317170  | Galactose mutarotase-like superfamily protein      | <i>Arabidopsis thaliana</i>      | 80         | 5e-68   | AT5G66530    |
| Lm38_C01_8               | JK317171  | Ribulose 1,5-biphosphate carboxylase/<br>oxygenase | <i>Triticum aestivum</i>         | 95         | 3e-62   | P26667       |
| Lm39_B05_68              | JK317172  | translation initiation factor 5A1                  | <i>Triticum aestivum</i>         | 98         | 2e-32   | AAZ95171     |
| Lm40_B02_17              | JK317174  | Methyljasmonate-inducible lipoxygenase 2           | <i>Hordeum vulgare</i>           | 87         | 1e-25   | P93184       |
| Lm41_B01_4               | JK317175  | Chlorophyll binding protein                        | <i>Helianthus annuus</i>         | 94         | 1e-15   | ACJ13835     |
| Lm42_A03_30              | JK317176  | ETTIN-like auxin response factor                   | <i>Triticum aestivum</i>         | 99         | 6e-45   | AAQ86960     |
| Lm43_A02_15              | JK317177  | Photosystem I reaction center subunit N            | <i>Hordeum vulgare</i>           | 100        | 1e-54   | P31093       |
| Lm44_A01_3               | JK317178  | Chloroplast RNA binding                            | <i>Arabidopsis thaliana</i>      | 96         | 5e-09   | AT1G09340    |
| Lm45_H11_95              | JK317179  | Histidine kinase                                   | <i>Sorangium cellulosum</i>      | 45         | 0.55    | YP_001613592 |
| Lm46_H07_91              | JK317180  | Cell wall-associated hydrolase                     | <i>Microscilla marina</i>        | 55         | 9e-08   | ZP_01689674  |
| Lm47_H03_87              | JK317181  | No significant homology                            |                                  |            |         |              |
| Lm48_F10_70 <sup>a</sup> | JK317182  | Arabinogalactan protein 18                         | <i>Arabidopsis thaliana</i>      | 100        | 0.012   | AT4G37450    |
| Lm49_F09_69              | JK317183  | No significant homology                            |                                  |            |         |              |
| Lm50_F07_67              | JK317185  | No significant homology                            |                                  |            |         |              |
| Lm51_E06_54 <sup>a</sup> | JK317186  | ARM repeat superfamily protein                     | <i>Arabidopsis thaliana</i>      | 92         | 0.73    | AT5G27010    |
| Lm52_D02_38              | JK317187  | No significant homology                            |                                  |            |         |              |
| Lm53_C11_35              | JK317188  | Similar to PDZ domain containing 6                 | <i>Ciona intestinalis</i>        | 48         | 0.42    | XP_002122300 |
| Lm54_B11_23              | JK317189  | Nucleotidyltransferase family protein              | <i>Arabidopsis thaliana</i>      | 50         | 0.22    | AT3G45760    |
| Lm55_A07_7               | JK317190  | No significant homology                            |                                  |            |         |              |
| Lm56_H08_102             | JK317191  | Serine/threonine protein kinase                    | <i>Cryptococcus gattii</i>       | 36         | 0.06    | XP_003193882 |
| Lm57_H01_8               | JK317192  | Predicted protein                                  | <i>Oryza sativa</i>              | 41         | 0.008   | CAE03625     |
| Lm58_G09_109             | JK317193  | RNA polymerase II, second largest subunit          | <i>Hordeum vulgare</i>           | 99         | 5e-49   | AAB94059     |
| Lm59_F10_116             | JK317239  | No significant homology                            |                                  |            |         |              |
| Lm60_F05_57              | JK317195  | Amylo-alpha-1,6-glucosidase                        | <i>Micromonospora carbonacea</i> | 37         | 0.24    | ZP_04609345  |
| Lm61_F04_43              | JK317196  | No significant homology                            |                                  |            |         |              |
| Lm62_E09_107             | JK317197  | B-box zinc finger family protein                   | <i>Arabidopsis thaliana</i>      | 100        | 0.52    | AT4G39070    |
| Lm64_B02_11              | JK317199  | Putative retrotransposon protein                   | <i>Phyllostachys edulis</i>      | 31         | 0.029   | ADB85430     |

**Supplemental Table 1.** (continued)

| Clone ID                 | Accession | Homology                                           | Organism                          | Identity % | E-value | Accession    |
|--------------------------|-----------|----------------------------------------------------|-----------------------------------|------------|---------|--------------|
| Lm65_A09_103             | JK317200  | DNA-3-methyladenine glycosylase                    | <i>Streptomyces hygroscopicus</i> | 36         | 0.68    | ZP_07298831  |
| Lm66_A08_94              | JK317201  | Putative gag-pol precursor                         | <i>Zea mays</i>                   | 48         | 7e-06   | AAL66751     |
| Lm67_E06_86              | JK317202  | Hypothetical protein                               | <i>Oryza sativa</i>               | 44         | 0.099   | BAD69283     |
| Lm68_A03_38              | JK317203  | Predicted protein                                  | <i>Populus trichocarpa</i>        | 95         | 8e-37   | XP_002338056 |
| Lm69_E01_1 <sup>a</sup>  | JK317204  | Predicted protein                                  | <i>Hordeum vulgare</i>            | 78         | 3e-18   | AK368418     |
| Lm71_H05_74 <sup>a</sup> | JK317207  | Predicted protein                                  | <i>Hordeum vulgare</i>            | 98         | 7e-14   | AK359580     |
| Lm72_H02_29              | JK317208  | Ribulose biphosphate carboxylase small chain       | <i>Arabidopsis thaliana</i>       | 63         | 2e-11   | AT1G67090    |
| Lm73_G04_58              | JK317209  | No significant homology                            |                                   |            |         |              |
| Lm74_A05_65              | JK317210  | Predicted protein                                  | <i>Hordeum vulgare</i>            | 93         | 1e-48   | BAJ91862     |
| Lm75_G08_80              | JK317211  | LETM1-like protein                                 | <i>Arabidopsis thaliana</i>       | 66         | 8e-07   | AT5G06220    |
| Lm76_G05_77              | JK317212  | MATE efflux family protein                         | <i>Arabidopsis thaliana</i>       | 43         | 0.28    | AT2G38330    |
| Lm77_F11_71              | JK317213  | Hypothetical protein                               | <i>Sorghum bicolor</i>            | 28         | 0.86    | AAD27567     |
| Lm78_H08_92 <sup>a</sup> | JK317214  | A genome HMW glutenin A gene locus                 | <i>Triticum turgidum</i>          | 74         | 5e-13   | FN564428     |
| Lm79_E07_55              | JK317215  | SER/ARG-rich protein 34A                           | <i>Arabidopsis thaliana</i>       | 27         | 0.36    | AT3G49430    |
| Lm80_E05_53              | JK317217  | No significant homology                            |                                   |            |         |              |
| Lm81_C10_34              | JK317218  | Galactose oxidase/kelch repeat superfamily protein | <i>Arabidopsis thaliana</i>       | 95         | 0.37    | AT5G60570    |
| Lm82_C08_32              | JK317219  | Glycine-rich protein                               | <i>Arabidopsis thaliana</i>       | 100        | 0.12    | AT5G46730    |
| Lm83_D01_37              | JK317220  | Unknown protein                                    | <i>Arabidopsis thaliana</i>       | 59         | 6e-08   | AT5G53930    |
| Lm85_A02_2               | JK317222  | Nuclear pore complex protein                       | <i>Arabidopsis thaliana</i>       | 47         | 0.27    | AT5G05680    |
| Lm86_H05_61              | JK317223  | Diacylglycerol kinase1                             | <i>Arabidopsis thaliana</i>       | 68         | 3e-20   | AT5G07920    |
| Lm87_H04_45              | JK317224  | Pheophytinase                                      | <i>Arabidopsis thaliana</i>       | 100        | 0.42    | AT5G13800    |
| Lm88_G08_101             | JK317225  | No significant homology                            |                                   |            |         |              |
| Lm89_E08_99              | JK317226  | No significant homology                            |                                   |            |         |              |
| Lm90_D05_49              | JK317228  | AtAPY1, apyrase 1                                  | <i>Arabidopsis thaliana</i>       | 82         | 0.044   | AT3G04080    |
| Lm91_D04_41              | JK317229  | Prolyl oligopeptidase family protein               | <i>Arabidopsis thaliana</i>       | 71         | 1e-14   | AT5G24260    |
| Lm92_C08_97              | JK317230  | Glutathione S-transferase                          | <i>Arabidopsis thaliana</i>       | 71         | 2e-12   | AT5G42150    |
| Lm93_C05_48              | JK317231  | Hypothetical protein                               | <i>Oryza sativa</i>               | 59         | 4e-35   | EEC80601     |
| Lm94_A06_62              | JK317232  | Putative harbinger transposase-derived nuclease    | <i>Arabidopsis thaliana</i>       | 36         | 1e-07   | AT2G13770    |
| Lm95_A04_36              | JK317233  | PAS/PAC sensor hybrid histidine kinase             | <i>Pseudomonas fulva</i>          | 43         | 0.84    | YP_004473704 |
| Lm96_F03_63              | JK317234  | Retrotransposon protein (Ty3-gypsy subclass)       | <i>Oryza sativa</i>               | 62         | 6e-49   | ABA98107     |

**Supplemental Table 1.** (continued)

| Clone ID                  | Accession | Homology                                     | Organism                    | Identity % | E-value | Accession    |
|---------------------------|-----------|----------------------------------------------|-----------------------------|------------|---------|--------------|
| Lm97_E11_59               | JK317235  | Putative Transposase (TNP2 family)           | <i>Oryza sativa</i>         | 41         | 2e-40   | AAX95379     |
| Lm98_E08_56               | JK317236  | Putative retrotransposon protein             | <i>Oryza sativa</i>         | 66         | 6e-08   | ABB47084     |
| Lm99_E04_52               | JK317237  | Retrotransposon protein                      | <i>Oryza sativa</i>         | 72         | 2e-56   | ABA93936     |
| Lm100_B08_20              | JK317124  | Transposon protein (CACTA, En/Spm sub-class) | <i>Oryza sativa</i>         | 37         | 2e-12   | ABF99296     |
| Lm101_B02_14              | JK317125  | TNP2-like transposase protein                | <i>Hordeum vulgare</i>      | 56         | 2e-29   | CAG30726     |
| Lm102_H09_110             | JK317126  | Putative retrotransposon protein             | <i>Oryza sativa</i>         | 62         | 2e-18   | ABA97489     |
| Lm103_H06_74              | JK317127  | Putative retrotransposon protein             | <i>Phyllostachys edulis</i> | 46         | 0.009   | ADB85414     |
| Lm104_F08_100             | JK317128  | Putative retrotransposon protein (Ty3-gypsy) | <i>Oryza sativa</i>         | 39         | 2e-08   | ABA98154     |
| Lm105_E05_51              | JK317129  | Putative retrotransposon protein             | <i>Oryza sativa</i>         | 64         | 1e-10   | NP_001065797 |
| Lm106_H03_48              | JK317130  | Late embryogenesis abundant protein (LEA)    | <i>Arabidopsis thaliana</i> | 55         | 2e-05   | AT3G15670    |
| Lm107_E01_10              | JK317131  | No significant homology                      |                             |            |         |              |
| Lm108_G02_36              | JK317132  | NAD(P)H:plastoquinone dehydrogenase          | <i>Arabidopsis thaliana</i> | 78         | 6e-33   | AT4G37925    |
| Lm109_G01_13              | JK317133  | Xyloglucan endotransglycosylase 6            | <i>Arabidopsis thaliana</i> | 77         | 2e-17   | AT4G25810    |
| Lm110_B07_76              | JK317135  | No significant homology                      |                             |            |         |              |
| Lm111_C07_31              | JK317136  | Protein kinase superfamily protein           | <i>Arabidopsis thaliana</i> | 100        | 0.75    | AT5G11410    |
| Lm112_B07_19 <sup>a</sup> | JK317137  | Retrotransposon                              | <i>Triticum monococcum</i>  | 85         | 3e-16   | AF326781     |
| Lm113_H02_18 <sup>a</sup> | JK317138  | Predicted protein                            | <i>Hordeum vulgare</i>      | 88         | 6e-28   | AK354795     |
| Lm114_G05_35              | JK317139  | Allene oxide cyclase 3                       | <i>Hordeum vulgare</i>      | 90         | 4e-19   | AK365667     |
| Lm115_F03_18              | JK317140  | No significant homology                      |                             |            |         |              |
| Lm116_C03_15              | JK317141  | ARR4, MEE7, ATRR1 response regulator 4       | <i>Arabidopsis thaliana</i> | 100        | 0.032   | AT1G10470    |

<sup>a</sup> indicates homology search was carried using nucleotide-nucleotide BLAST (blastn).
